# Supplementary material for: Inferring Species Trees from Gene Trees in a Radiation of California Trapdoor Spiders (Araneae, Antrodiaetidae, Aliatypus)
Source: PLoS One. 2011 Sep 26;6(9):e25355. doi: 10.1371/journal.pone.0025355 (PMC3180454; doi:10.1371/journal.pone.0025355)
Supplement: Table S4 — Average K2P corrected sequence divergence. (XLS) [file pone.0025355.s004.xls]

## Sheet: Sheet1
	californicus	gnomus	janus	isolatus	erebus	trophonius	plutonis	torridus
californicus	11.81
gnomus	10.43	X
janus	13.7	12.99	12.37
isolatus	14.07	12.9	14.32	11.28
erebus					10.98
trophonius					11.32	X
plutonis					15.12	14.81	11.29
torridus					13.67	13.6	12.56	9.77
